# Supplementary material
Source: PubMed Central journal article supplement (PMC2841942)
Supplement: 0911109107_pnas.200911109SI.pdf [file 0911109107_pnas.200911109SI.pdf]

# Supporting Information

Bierut et al. 10.1073/pnas.0911109107

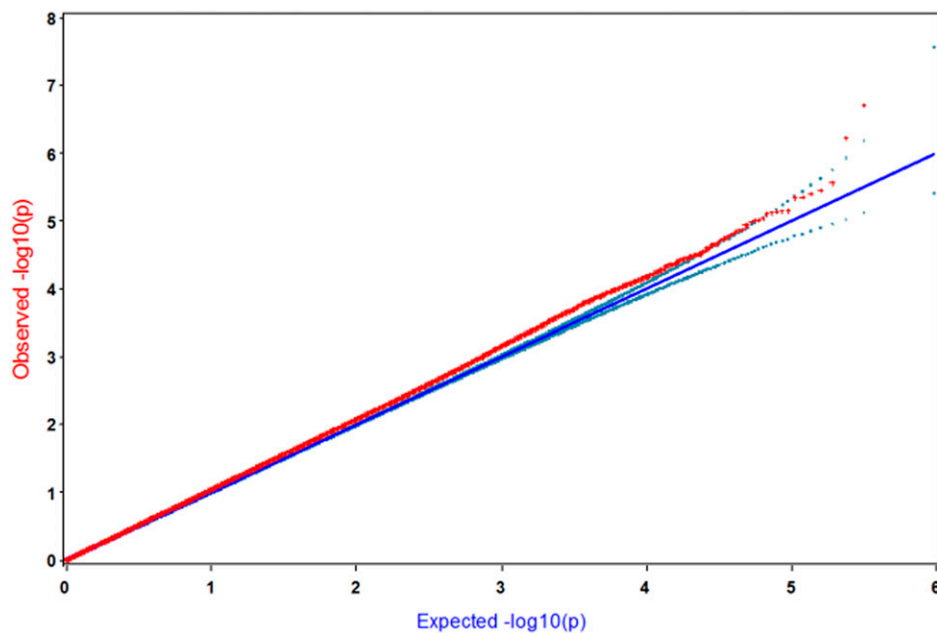

Fig. S1. Q-Q plot of the observed (in red) and expected (in blue)  $P$  values obtained from multivariate logistic models testing for association with alcohol dependence.

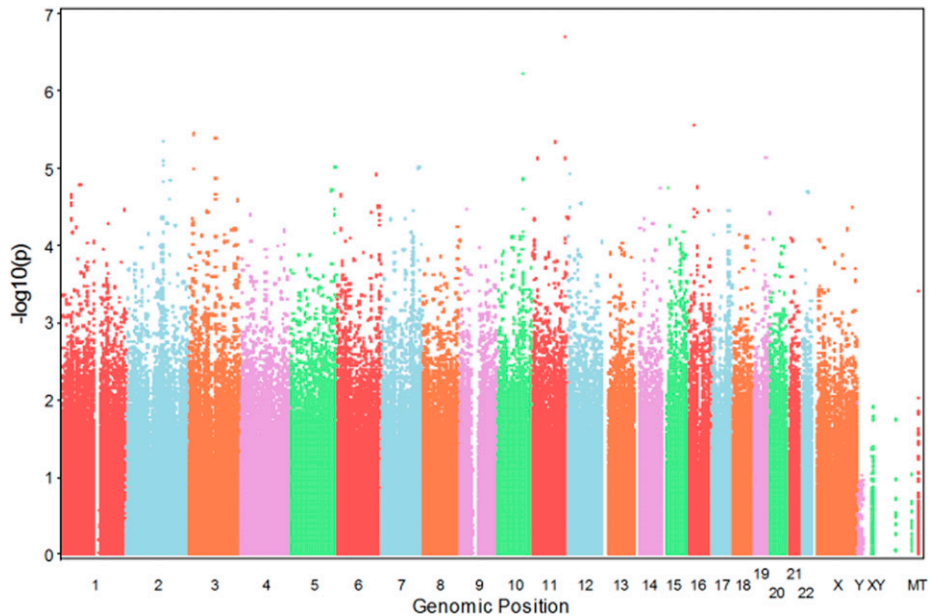

Fig. S2. Manhattan plot of  $P$  values from multivariate logistic regression models testing for association with alcohol dependence.

**Table S1. Characteristics of alcohol-dependent cases and nondependent controls by source study**

| Characteristic                        | COGA                 |                         | COGEND               |                         | FSCD                 |                         |
|---------------------------------------|----------------------|-------------------------|----------------------|-------------------------|----------------------|-------------------------|
|                                       | Cases <i>n</i> = 899 | Controls <i>n</i> = 509 | Cases <i>n</i> = 450 | Controls <i>n</i> = 927 | Cases <i>n</i> = 548 | Controls <i>n</i> = 496 |
| Sex, <i>n</i> (%)                     |                      |                         |                      |                         |                      |                         |
| Males                                 | 610 (67.9)           | 148 (29.1)*             | 233 (51.8)           | 247 (26.6)*             | 312 (56.9)           | 211 (42.5)*             |
| Females                               | 289 (32.1)           | 361 (70.9)              | 217 (48.2)           | 680 (73.4)              | 236 (43.1)           | 285 (57.5)              |
| Age, years                            |                      |                         |                      |                         |                      |                         |
| Mean ± SD.                            | 41.5 ± 10.2          | 45.3 ± 10.2             | 37.1 ± 5.9           | 37.1 ± 6.8              | 36.5 ± 9.0           | 37.1 ± 8.9              |
| Range                                 | 18.0–77.0            | 24.0–65.0               | 25.0–61.0            | 25.0–65.0               | 18.0–60.0            | 18.0–60.0               |
| Self-reported race, <i>n</i> (%)      |                      |                         |                      |                         |                      |                         |
| European-American                     | 612 (68.1)           | 412 (80.9)*             | 343 (76.2)           | 774 (83.5)              | 280 (51.1)           | 247 (49.8)              |
| African-American                      | 287 (31.9)           | 97 (19.1)               | 107 (23.8)           | 153 (16.2)              | 268 (48.9)           | 249 (50.2)              |
| Self-reported ethnicity, <i>n</i> (%) |                      |                         |                      |                         |                      |                         |
| Hispanic                              | 65 (7.2)             | 38 (7.5)                | 11 (2.4)             | 18 (1.9)                | 11 (2.4)             | 18 (1.9)                |
| Alcohol dependence                    |                      |                         |                      |                         |                      |                         |
| Diagnosis, <i>n</i> (%)               | 899 (100.0)          | 0 (0.0)*                | 450 (100.0)          | 0 (0.0)*                | 548 (100.0)          | 0 (0.0)*                |
| Number of symptoms, $\bar{x} \pm s$   | 5.5 ± 1.3            | 0.1 ± 0.3*              | 4.4 ± 1.4            | 0.1 ± 0.9*              | 5.3 ± 1.5            | 0.6 ± 0.8*              |
| Comorbid diagnoses, <i>n</i> (%)      |                      |                         |                      |                         |                      |                         |
| Marijuana dependence                  | 297 (33.0)           | 0 (0.0)*                | 104 (23.1)           | 0 (0.0)*                | 262 (47.8)           | 0 (0.0)*                |
| Cocaine dependence                    | 396 (44.0)           | 0 (0.0)*                | 80 (17.8)            | 0 (0.0)*                | 440 (80.3)           | 0 (0.0)*                |
| Opioid dependence                     | 119 (13.2)           | 0 (0.0)*                | 27 (6.0)             | 0 (0.0)*                | 117 (21.4)           | 0 (0.0)*                |
| Other dependence                      | 230 (25.6)           | 0 (0.0)*                | 42 (9.3)             | 0 (0.0)*                | 197 (35.9)           | 0 (0.0)*                |
| Smoked 100+ cigarettes                | 792 (88.1)           | 172 (33.8)*             | 443 (98.4)           | 883 (95.3)              | 472 (86.1)           | 84 (16.9)*              |
| Nicotine dependence**                 | 543 (60.4)           | 66 (13.0)*              | 261 (58.0)           | 14 (1.5)*               | 355 (64.8)           | 15 (3.0)*               |

COGA, Collaborative Study on the Genetics of Alcoholism; COGEND, Collaborative Genetic Study of Nicotine Dependence; FSCD, Family Study of Cocaine Dependence.

\*Difference between cases and controls,  $P < 0.0001$ .

\*\*Nicotine dependence defined by a score of 4 or greater on the Fagerström Test for Nicotine Dependence.



**Table S3. Replication studies: Adjusted odds ratios and confidence limits for the top 15 SNPs identified in the SAGE sample for the COGA family-based genetic sample and the German case-control sample**

| SNP        | SAGE risk allele | COGA <i>P</i> * | Frequency of risk allele |          | OR (95% CI)      | <i>P</i> |
|------------|------------------|-----------------|--------------------------|----------|------------------|----------|
|            |                  |                 | Cases                    | Controls |                  |          |
| rs10893366 | T                | 0.44            | 0.15                     | 0.17     | 0.84 (0.69–1.04) | 0.103    |
| rs2039617  | T                | 0.17            |                          |          |                  |          |
| rs9302534  | C                | 0.36            | 0.37                     | 0.36     | 1.03 (0.88–1.20) | 0.689    |
| rs1318937  | G                | 0.75            | 0.12                     | 0.12     | 0.97 (0.77–1.22) | 0.821    |
| rs2700648  | A                | 0.57            |                          |          |                  |          |
| rs10803574 | A                | 0.61            | 0.42                     | 0.43     | 0.96 (0.82–1.11) | 0.554    |
| rs6483362  | A                | 0.15            |                          |          |                  |          |
| rs2722650  | A                | 0.35            |                          |          |                  |          |
| rs10893365 | C                | 0.51            |                          |          |                  |          |
| rs1386449  | T                | 0.09            |                          |          |                  |          |
| rs750338   | C                | 0.50            | 0.21                     | 0.23     | 0.87 (0.73–1.05) | 0.143    |
| rs1505846  | A                | 0.62            | 0.42                     | 0.43     | 0.95 (0.82–1.10) | 0.501    |
| rs9636231  | A                | 0.33            | 0.29                     | 0.32     | 0.87 (0.74–1.03) | 0.106    |
| rs1363605  | A                | 0.91            |                          |          |                  |          |
| rs10224675 | G                | 0.08            |                          |          |                  |          |

SAGE, Study of Addiction: Genetics and Environment.

\*COGA tested using Family-Based Association Test (FBAT); 258 families, 2249 individuals.



**Table S5. SAGE association results for all GABRA2 SNPs**

| SNP        | Chr | Position   | COGA <i>P</i> * | Risk allele | SAGE                     |          |                      |          |
|------------|-----|------------|-----------------|-------------|--------------------------|----------|----------------------|----------|
|            |     |            |                 |             | Frequency of risk allele |          | Adjusted OR (95% CI) | <i>P</i> |
|            |     |            |                 |             | Cases                    | Controls |                      |          |
| rs16859193 | 4   | 45,890,861 |                 | G           | 0.128                    | 0.099    | 0.87 (0.72–1.04)     | 1.17E-01 |
| rs1440133  | 4   | 45,896,677 |                 | A           | 0.367                    | 0.361    | 1.13 (1.02–1.25)     | 1.95E-02 |
| rs495752   | 4   | 45,900,293 |                 | A           | 0.360                    | 0.355    | 1.13 (1.02–1.26)     | 1.85E-02 |
| rs522636   | 4   | 45,922,604 |                 | T           | 0.463                    | 0.511    | 0.91 (0.82–1.01)     | 6.95E-02 |
| rs534787   | 4   | 45,927,453 |                 | T           | 0.462                    | 0.510    | 0.91 (0.82–1.01)     | 8.34E-02 |
| rs16859210 | 4   | 45,931,211 |                 | T           | 0.063                    | 0.047    | 0.90 (0.71–1.13)     | 3.58E-01 |
| rs478179   | 4   | 45,933,494 |                 | T           | 0.237                    | 0.249    | 0.97 (0.86–1.09)     | 6.18E-01 |
| rs511310   | 4   | 45,934,761 |                 | A           | 0.082                    | 0.083    | 1.11 (0.93–1.33)     | 2.51E-01 |
| rs16859227 | 4   | 45,945,362 |                 | T           | 0.220                    | 0.206    | 1.16 (1.03–1.31)     | 1.43E-02 |
| rs572227   | 4   | 45,946,150 | 3.80E-02        | A           | 0.376                    | 0.366    | 1.15 (1.04–1.27)     | 8.89E-03 |
| rs534459   | 4   | 45,951,562 |                 | C           | 0.473                    | 0.521    | 0.90 (0.82–1.00)     | 4.84E-02 |
| rs505474   | 4   | 45,955,344 |                 | A           | 0.524                    | 0.476    | 1.10 (1.00–1.22)     | 5.73E-02 |
| rs554112   | 4   | 45,957,533 |                 | T           | 0.383                    | 0.368    | 1.16 (1.05–1.29)     | 4.46E-02 |
| rs548583   | 4   | 45,958,101 | 1.20E-02        | T           | 0.404                    | 0.385    | 1.14 (1.03–1.26)     | 1.05E-02 |
| rs526805   | 4   | 45,958,148 |                 | G           | 0.421                    | 0.396    | 1.15 (1.04–1.27)     | 5.51E-03 |
| rs2119183  | 4   | 45,967,563 |                 | A           | 0.080                    | 0.087    | 1.00 (0.84–1.20)     | 9.82E-01 |
| rs502038   | 4   | 45,975,075 |                 | G           | 0.401                    | 0.385    | 1.13 (1.02–1.25)     | 1.61E-02 |
| rs279873   | 4   | 45,999,124 |                 | T           | 0.472                    | 0.520    | 0.90 (0.81–1.00)     | 4.19E-02 |
| rs279864   | 4   | 46,005,792 |                 | C           | 0.473                    | 0.520    | 0.90 (0.82–1.00)     | 5.18E-02 |
| rs1808851  | 4   | 46,006,204 |                 | G           | 0.396                    | 0.380    | 1.15 (1.04–1.28)     | 5.29E-03 |
| rs279858   | 4   | 46,009,350 | 8.70E-03        | G           | 0.375                    | 0.366    | 1.16 (1.05–1.28)     | 5.04E-03 |
| rs16859306 | 4   | 46,010,737 |                 | C           | 0.101                    | 0.077    | 0.88 (0.72–1.07)     | 1.97E-01 |
| rs279856   | 4   | 46,012,680 |                 | T           | 0.497                    | 0.457    | 1.11 (1.00–1.23)     | 4.28E-02 |
| rs3775282  | 4   | 46,016,620 |                 | C           | 0.139                    | 0.142    | 1.06 (0.92–1.22)     | 4.09E-01 |
| rs279843   | 4   | 46,019,961 | 4.90E-02        | T           | 0.444                    | 0.421    | 1.11 (1.00–1.22)     | 4.24E-02 |
| rs279841   | 4   | 46,035,520 | 3.80E-02        | A           | 0.368                    | 0.364    | 1.13 (1.02–1.25)     | 2.29E-02 |
| rs189957   | 4   | 46,041,436 |                 | G           | 0.469                    | 0.448    | 1.09 (0.98–1.20)     | 1.06E-01 |
| rs16859325 | 4   | 46,047,625 |                 | A           | 0.026                    | 0.017    | 1.04 (0.74–1.47)     | 8.22E-01 |
| rs10805145 | 4   | 46,053,088 |                 | C           | 0.459                    | 0.439    | 1.09 (0.99–1.20)     | 8.53E-02 |
| rs1442060  | 4   | 46,060,824 |                 | G           | 0.446                    | 0.487    | 0.88 (0.80–0.98)     | 1.47E-02 |
| rs3849591  | 4   | 46,063,398 |                 | T           | 0.149                    | 0.149    | 1.12 (0.98–1.29)     | 9.63E-02 |
| rs9291283  | 4   | 46,066,590 |                 | A           | 0.282                    | 0.252    | 1.12 (1.00–1.25)     | 4.44E-02 |
| rs13152740 | 4   | 46,075,978 |                 | A           | 0.269                    | 0.243    | 1.12 (1.00–1.26)     | 4.88E-02 |
| rs10013922 | 4   | 46,084,118 |                 | G           | 0.272                    | 0.248    | 1.10 (0.98–1.23)     | 9.26E-02 |
| rs3756007  | 4   | 46,085,821 |                 | C           | 0.039                    | 0.039    | 1.15 (0.89–1.48)     | 2.84E-01 |
| rs894269   | 4   | 46,088,369 |                 | T           | 0.164                    | 0.175    | 1.01 (0.88–1.15)     | 8.79E-01 |
| rs1025852  | 4   | 46,095,088 |                 | A           | 0.366                    | 0.389    | 0.88 (0.79–0.97)     | 1.35E-02 |
| rs6847731  | 4   | 46,096,909 |                 | G           | 0.415                    | 0.437    | 0.91 (0.83–1.01)     | 7.62E-02 |
| rs1545234  | 4   | 46,099,170 |                 | G           | 0.301                    | 0.300    | 1.01 (0.91–1.13)     | 8.55E-01 |

\*COGA family-based association from ref. 1.

- Edenberg HJ, et al. (2004) Variations in GABRA2, encoding the alpha 2 subunit of the GABA(A) receptor, are associated with alcohol dependence and with brain oscillations. *Am J Hum Genet* 74:705–714.

**Table S6. SAGE association results by self-reported race for all GABRA2 SNPs**

African-American (n = 1161)

European-American (n = 2668)

| SNP        | Position   | Risk allele | Frequency of risk allele |          |                  | European-American (n = 2668) |       |          | African-American (n = 1161) |          |          |             |  |   |
|------------|------------|-------------|--------------------------|----------|------------------|------------------------------|-------|----------|-----------------------------|----------|----------|-------------|--|---|
|            |            |             | Cases                    |          | Controls         | OR (95% CI)                  |       | P        | Cases                       |          | Controls | OR (95% CI) |  | P |
|            |            |             | Cases                    | Controls | OR (95% CI)      | P                            | Cases | Controls | OR (95% CI)                 | P        |          |             |  |   |
| rs16859193 | 45,890,861 | G           | 0.002                    | 0.003    | 0.36 (0.10–1.32) | 1.22E-01                     | 0.362 | 0.376    | 0.90 (0.75–1.07)            | 2.34E-01 |          |             |  |   |
| rs1440133  | 45,896,677 | A           | 0.422                    | 0.397    | 1.15 (1.02–1.29) | 2.65E-02                     | 0.265 | 0.255    | 1.10 (0.90–1.34)            | 3.61E-01 |          |             |  |   |
| rs522636   | 45,922,604 | T           | 0.575                    | 0.599    | 0.88 (0.78–0.99) | 3.56E-02                     | 0.252 | 0.258    | 0.99 (0.81–1.21)            | 8.90E-01 |          |             |  |   |
| rs534787   | 45,927,453 | T           | 0.575                    | 0.598    | 0.88 (0.78–0.99) | 3.40E-02                     | 0.251 | 0.254    | 1.00 (0.82–1.23)            | 9.67E-01 |          |             |  |   |
| rs16859210 | 45,931,211 | T           | 0.002                    | 0.002    | 0.65 (0.14–2.93) | 5.74E-01                     | 0.178 | 0.178    | 0.92 (0.73–1.16)            | 4.92E-01 |          |             |  |   |
| rs478179   | 45,933,494 | T           | 0.272                    | 0.277    | 0.94 (0.82–1.08) | 3.82E-01                     | 0.170 | 0.169    | 1.07 (0.85–1.36)            | 5.53E-01 |          |             |  |   |
| rs511310   | 45,934,761 | A           | 0.113                    | 0.103    | 1.13 (0.93–1.37) | 2.15E-01                     | 0.023 | 0.024    | 1.03 (0.58–1.83)            | 9.17E-01 |          |             |  |   |
| rs16859227 | 45,945,362 | T           | 0.253                    | 0.230    | 1.15 (1.00–1.32) | 5.01E-02                     | 0.155 | 0.131    | 1.20 (0.93–1.55)            | 1.64E-01 |          |             |  |   |
| rs572227   | 45,946,150 | A           | 0.424                    | 0.398    | 1.15 (1.02–1.30) | 2.04E-02                     | 0.288 | 0.271    | 1.13 (0.93–1.38)            | 2.22E-01 |          |             |  |   |
| rs534459   | 45,951,562 | C           | 0.566                    | 0.592    | 0.87 (0.77–0.98) | 2.23E-02                     | 0.299 | 0.317    | 0.97 (0.80–1.18)            | 7.67E-01 |          |             |  |   |
| rs505474   | 45,955,344 | A           | 0.429                    | 0.403    | 1.14 (1.01–1.29) | 2.91E-02                     | 0.699 | 0.682    | 1.03 (0.85–1.25)            | 7.50E-01 |          |             |  |   |
| rs554112   | 45,957,533 | T           | 0.430                    | 0.400    | 1.17 (1.03–1.32) | 1.18E-02                     | 0.291 | 0.273    | 1.15 (0.94–1.39)            | 1.72E-01 |          |             |  |   |
| rs48583    | 45,958,101 | T           | 0.430                    | 0.401    | 1.16 (1.03–1.31) | 1.54E-02                     | 0.356 | 0.341    | 1.11 (0.92–1.33)            | 2.93E-01 |          |             |  |   |
| rs526805   | 45,958,148 | G           | 0.430                    | 0.401    | 1.16 (1.03–1.31) | 1.54E-02                     | 0.404 | 0.380    | 1.14 (0.95–1.37)            | 1.60E-01 |          |             |  |   |
| rs2119183  | 45,967,563 | A           | 0.111                    | 0.111    | 0.97 (0.80–1.17) | 7.50E-01                     | 0.022 | 0.018    | 1.31 (0.69–2.46)            | 4.08E-01 |          |             |  |   |
| rs502038   | 45,975,075 | G           | 0.427                    | 0.400    | 1.15 (1.02–1.30) | 1.93E-02                     | 0.349 | 0.338    | 1.09 (0.90–1.32)            | 3.74E-01 |          |             |  |   |
| rs279873   | 45,999,124 | T           | 0.562                    | 0.590    | 0.86 (0.76–0.97) | 1.49E-02                     | 0.303 | 0.318    | 0.98 (0.81–1.19)            | 8.50E-01 |          |             |  |   |
| rs279864   | 46,005,792 | C           | 0.562                    | 0.590    | 0.86 (0.77–0.97) | 1.67E-02                     | 0.305 | 0.318    | 0.99 (0.82–1.20)            | 9.35E-01 |          |             |  |   |
| rs1808851  | 46,006,204 | G           | 0.435                    | 0.407    | 1.17 (1.04–1.32) | 1.05E-02                     | 0.323 | 0.300    | 1.13 (0.93–1.36)            | 2.10E-01 |          |             |  |   |
| rs279858   | 46,009,350 | G           | 0.434                    | 0.406    | 1.17 (1.03–1.31) | 1.20E-02                     | 0.265 | 0.246    | 1.15 (0.94–1.41)            | 1.73E-01 |          |             |  |   |
| rs16859306 | 46,010,737 | C           | 0.002                    | 0.003    | 0.37 (0.10–1.40) | 1.43E-01                     | 0.286 | 0.290    | 0.91 (0.74–1.11)            | 3.37E-01 |          |             |  |   |
| rs279856   | 46,012,680 | T           | 0.434                    | 0.406    | 1.16 (1.03–1.31) | 1.50E-02                     | 0.611 | 0.600    | 1.01 (0.84–1.21)            | 9.48E-01 |          |             |  |   |
| rs3775282  | 46,016,620 | C           | 0.174                    | 0.166    | 1.07 (0.91–1.25) | 4.09E-01                     | 0.073 | 0.071    | 1.02 (0.72–1.45)            | 9.03E-01 |          |             |  |   |
| rs279843   | 46,019,961 | T           | 0.437                    | 0.411    | 1.15 (1.02–1.30) | 2.23E-02                     | 0.459 | 0.448    | 1.03 (0.86–1.23)            | 7.47E-01 |          |             |  |   |
| rs279841   | 46,035,520 | A           | 0.432                    | 0.408    | 1.14 (1.02–1.29) | 2.70E-02                     | 0.248 | 0.237    | 1.10 (0.89–1.35)            | 3.74E-01 |          |             |  |   |
| rs189957   | 46,041,436 | G           | 0.457                    | 0.430    | 1.15 (1.02–1.29) | 2.40E-02                     | 0.490 | 0.497    | 0.98 (0.82–1.17)            | 8.12E-01 |          |             |  |   |
| rs16859325 | 46,047,625 | A           | 0.000                    | 0.000    | 1.14 (1.01–1.28) | 9.99E-01                     | 0.076 | 0.064    | 1.08 (0.77–1.53)            | 6.47E-01 |          |             |  |   |
| rs10805145 | 46,053,088 | C           | 0.456                    | 0.431    | 0.87 (0.77–0.98) | 3.15E-02                     | 0.464 | 0.462    | 1.01 (0.85–1.21)            | 8.96E-01 |          |             |  |   |
| rs1442060  | 46,060,824 | G           | 0.491                    | 0.521    | 0.87 (0.77–0.98) | 2.51E-02                     | 0.361 | 0.391    | 0.91 (0.75–1.09)            | 3.01E-01 |          |             |  |   |
| rs3849591  | 46,063,398 | T           | 0.182                    | 0.171    | 1.15 (0.98–1.34) | 7.74E-02                     | 0.088 | 0.086    | 1.02 (0.74–1.40)            | 9.03E-01 |          |             |  |   |
| rs9291283  | 46,066,590 | A           | 0.266                    | 0.241    | 1.13 (0.98–1.29) | 9.08E-02                     | 0.313 | 0.281    | 1.13 (0.93–1.38)            | 2.15E-01 |          |             |  |   |
| rs13152740 | 46,075,978 | A           | 0.265                    | 0.240    | 1.12 (0.98–1.29) | 9.96E-02                     | 0.275 | 0.249    | 1.13 (0.92–1.38)            | 2.45E-01 |          |             |  |   |
| rs10013922 | 46,084,118 | G           | 0.266                    | 0.242    | 1.10 (0.96–1.27) | 1.60E-01                     | 0.281 | 0.255    | 1.11 (0.91–1.35)            | 3.24E-01 |          |             |  |   |
| rs3756007  | 46,085,821 | C           | 0.053                    | 0.049    | 1.12 (0.86–1.47) | 4.06E-01                     | 0.014 | 0.011    | 1.36 (0.60–3.08)            | 4.55E-01 |          |             |  |   |
| rs894269   | 46,088,369 | T           | 0.209                    | 0.211    | 0.97 (0.84–1.13) | 7.21E-01                     | 0.078 | 0.069    | 1.24 (0.88–1.73)            | 2.18E-01 |          |             |  |   |
| rs1025852  | 46,095,088 | A           | 0.354                    | 0.377    | 0.88 (0.77–1.00) | 4.78E-02                     | 0.387 | 0.425    | 0.88 (0.73–1.05)            | 1.48E-01 |          |             |  |   |
| rs6847731  | 46,096,909 | G           | 0.423                    | 0.439    | 0.92 (0.81–1.04) | 1.74E-01                     | 0.397 | 0.431    | 0.90 (0.75–1.08)            | 2.42E-01 |          |             |  |   |
| rs1545234  | 46,099,170 | G           | 0.306                    | 0.307    | 1.01 (0.89–1.15) | 8.61E-01                     | 0.293 | 0.283    | 1.01 (0.83–1.22)            | 9.57E-01 |          |             |  |   |

**Table S7. Adjusted odds ratios and confidence intervals for SNPs with  $P \leq 1 \times 10^{-6}$  identified in SAGE European-Americans and corresponding results in SAGE African-Americans**

| SNP        | Chr | Position    | Gene                | Risk Allele | European-Americans (n = 2668) |          |                     |          | African-Americans (n = 1161) |                          |          |                      |          |       |
|------------|-----|-------------|---------------------|-------------|-------------------------------|----------|---------------------|----------|------------------------------|--------------------------|----------|----------------------|----------|-------|
|            |     |             |                     |             | Frequency of risk allele      |          | AdjustedOR (95% CI) | P        | FDR                          | Frequency of risk allele |          | Adjusted OR (95% CI) | P        | FDR   |
|            |     |             |                     |             | Cases                         | Controls |                     |          |                              | Cases                    | Controls |                      |          |       |
| rs10913569 | 1   | 176,784,631 | <i>Ctorf220</i>     | A           | 0.11                          | 0.15     | 0.64 (0.54–0.76)    | 9.22E-07 | 0.251                        | 0.61                     | 0.61     | 0.95 (0.79–1.13)     | 5.45E-01 | 0.999 |
| rs433303   | 3   | 11,219,906  | <i>HRH1</i>         | T           | 0.43                          | 0.37     | 1.34 (1.19–1.51)    | 1.72E-06 | 0.251                        | 0.09                     | 0.10     | 0.86 (0.64–1.16)     | 3.29E-01 | 0.996 |
| rs6701037  | 1   | 173,386,702 |                     | C           | 0.47                          | 0.40     | 1.34 (1.19–1.51)    | 1.75E-06 | 0.251                        | 0.33                     | 0.34     | 0.91 (0.76–1.10)     | 3.40E-01 | 0.999 |
| rs12776254 | 10  | 2,144,862   |                     | G           | 0.18                          | 0.14     | 1.48 (1.26–1.74)    | 1.82E-06 | 0.251                        | 0.08                     | 0.10     | 0.76 (0.56–1.03)     | 7.94E-02 | 0.994 |
| rs1057302  | 1   | 173,393,046 |                     | C           | 0.46                          | 0.40     | 1.34 (1.19–1.51)    | 1.94E-06 | 0.251                        | 0.27                     | 0.30     | 0.89 (0.73–1.08)     | 2.27E-01 | 0.995 |
| rs1057239  | 1   | 173,396,827 | <i>LOC100129443</i> | T           | 0.46                          | 0.40     | 1.34 (1.19–1.51)    | 2.01E-06 | 0.251                        | 0.38                     | 0.40     | 0.91 (0.76–1.09)     | 3.01E-01 | 0.995 |
| rs7445832  | 5   | 62,622,057  |                     | A           | 0.28                          | 0.21     | 1.40 (1.22–1.61)    | 2.26E-06 | 0.251                        | 0.35                     | 0.40     | 0.91 (0.76–1.10)     | 3.39E-01 | 0.996 |
| rs6425323  | 1   | 173,391,659 |                     | T           | 0.46                          | 0.40     | 1.34 (1.19–1.51)    | 2.27E-06 | 0.251                        | 0.33                     | 0.35     | 0.93 (0.77–1.11)     | 4.06E-01 | 0.996 |
| rs750338   | 11  | 124,677,803 | <i>PKNOX2</i>       | C           | 0.26                          | 0.20     | 1.40 (1.22–1.61)    | 2.39E-06 | 0.251                        | 0.47                     | 0.45     | 1.14 (0.96–1.36)     | 1.39E-01 | 0.994 |
| rs1894709  | 1   | 173,398,994 | <i>LOC100129443</i> | A           | 0.46                          | 0.40     | 1.33 (1.18–1.50)    | 2.78E-06 | 0.262                        | 0.38                     | 0.41     | 0.90 (0.75–1.07)     | 2.25E-01 | 0.999 |
| rs9540953  | 13  | 66,421,259  | <i>PCDH9</i>        | C           | 0.19                          | 0.15     | 1.47 (1.25–1.72)    | 3.42E-06 | 0.293                        | 0.16                     | 0.16     | 1.01 (0.79–1.29)     | 9.62E-01 | 0.999 |
| rs4233175  | 1   | 176,784,214 | <i>Ctorf220</i>     | A           | 0.11                          | 0.14     | 0.65 (0.55–0.78)    | 3.78E-06 | 0.297                        | 0.50                     | 0.50     | 1.01 (0.85–1.20)     | 9.06E-01 | 0.999 |
| rs2011946  | 2   | 136,534,066 |                     | G           | 0.32                          | 0.37     | 0.75 (0.66–0.85)    | 4.15E-06 | 0.301                        | 0.79                     | 0.78     | 1.09 (0.88–1.36)     | 4.19E-01 | 0.996 |
| rs17791001 | 13  | 66,419,015  | <i>PCDH9</i>        | C           | 0.19                          | 0.15     | 1.45 (1.24–1.71)    | 5.40E-06 | 0.358                        | 0.16                     | 0.16     | 1.03 (0.81–1.32)     | 8.12E-01 | 0.999 |
| rs4907956  | 1   | 102,085,291 | <i>OLFM3</i>        | T           | 0.40                          | 0.34     | 1.33 (1.18–1.51)    | 5.83E-06 | 0.358                        | 0.07                     | 0.09     | 0.71 (0.52–0.98)     | 3.62E-02 | 0.994 |
| rs2842576  | 1   | 52,096,816  | <i>NRD1</i>         | C           | 0.07                          | 0.09     | 0.59 (0.47–0.74)    | 6.07E-06 | 0.358                        | 0.09                     | 0.10     | 0.92 (0.67–1.25)     | 5.86E-01 | 0.999 |
| rs17427389 | 6   | 151,204,808 | <i>PLEKHG1</i>      | A           | 0.20                          | 0.15     | 1.44 (1.23–1.69)    | 6.45E-06 | 0.358                        | 0.06                     | 0.05     | 1.07 (0.73–1.58)     | 7.15E-01 | 0.999 |
| rs11870068 | 17  | 63,374,977  | <i>BTF</i>          | C           | 0.24                          | 0.19     | 1.39 (1.20–1.61)    | 7.67E-06 | 0.383                        | 0.16                     | 0.15     | 1.08 (0.84–1.37)     | 5.50E-01 | 0.999 |
| rs6585783  | 10  | 85,779,290  |                     | T           | 0.62                          | 0.55     | 1.32 (1.17–1.49)    | 8.02E-06 | 0.383                        | 0.13                     | 0.15     | 0.82 (0.64–1.06)     | 1.30E-01 | 0.994 |
| rs12284594 | 11  | 124,685,063 | <i>PKNOX2</i>       | G           | 0.19                          | 0.15     | 1.44 (1.22–1.68)    | 8.12E-06 | 0.383                        | 0.33                     | 0.33     | 1.04 (0.86–1.25)     | 6.79E-01 | 0.999 |

**Table S8. Adjusted odds ratios and confidence intervals for SNPs with  $P \leq 1 \times 10^{-6}$  identified in SAGE African Americans and corresponding results in SAGE European Americans**

| SNP        | Chr | Position    | Risk Allele | African-Americans (n = 1161) |          |                      |          | European-Americans (n = 2668) |                          |          |                      |          |       |
|------------|-----|-------------|-------------|------------------------------|----------|----------------------|----------|-------------------------------|--------------------------|----------|----------------------|----------|-------|
|            |     |             |             | Frequency of risk allele     |          | Adjusted OR (95% CI) | P        | FDR                           | Frequency of risk allele |          | Adjusted OR (95% CI) | P        | FDR   |
|            |     |             |             | Cases                        | Controls |                      |          |                               | Cases                    | Controls |                      |          |       |
| rs7777391  | 7   | 117,409,113 | A           | 0.42                         | 0.32     | 1.59 (1.31–1.92)     | 2.70E-06 | 0.994                         | 0.38                     | 0.38     | 1.00 (0.88–1.13)     | 9.85E-01 | 0.999 |
| rs1530485  | 13  | 63,130,342  | A           | 0.56                         | 0.48     | 1.50 (1.27–1.79)     | 3.52E-06 | 0.994                         | 0.03                     | 0.03     | 0.82 (0.59–1.12)     | 2.12E-01 | 0.966 |
| rs4610908  | X   | 35,094,456  | A           | 0.33                         | 0.23     | 1.69 (1.35–2.12)     | 5.49E-06 | 0.994                         | 0.25                     | 0.25     | 1.00 (0.86–1.17)     | 9.92E-01 | 0.999 |
| rs1386449  | 11  | 19,444,659  | T           | 0.14                         | 0.07     | 2.01 (1.49–2.72)     | 5.68E-06 | 0.994                         | 0.00                     | 0.00     | 0.00 (0.00–0.00)     | 9.99E-01 | 0.999 |
| rs699771   | 1   | 119,673,500 | A           | 0.17                         | 0.11     | 1.84 (1.41–2.40)     | 8.87E-06 | 0.994                         | 0.01                     | 0.01     | 0.81 (0.43–1.54)     | 5.26E-01 | 0.999 |
| rs2810864  | 13  | 63,140,115  | A           | 0.55                         | 0.47     | 1.48 (1.25–1.76)     | 9.00E-06 | 0.994                         | 0.03                     | 0.03     | 0.78 (0.54–1.11)     | 1.69E-01 | 0.958 |
| rs11727470 | 4   | 30,153,112  | A           | 0.50                         | 0.58     | 0.67 (0.56–0.80)     | 9.68E-06 | 0.994                         | 0.27                     | 0.29     | 0.97 (0.86–1.11)     | 6.98E-01 | 0.999 |
